# Supplementary material for: Assessment of the Geographic Distribution of Ornithodoros turicata (Argasidae): Climate Variation and Host Diversity
Source: PubMed Central journal article supplement (PMC4734830; doi:10.1371/journal.pntd.0004383), 2016-02-01
Supplement: pntd.0004383.s007.pdf [file pntd.0004383.s007.pdf]

**S2 Table.** Correlation matrix of all twenty environmental layers. Positive correlations  $\geq 0.80$  shown in red and negative correlations  $\leq -0.80$  shown in yellow. For variable names refer to the S1 Table.

|       | BIO1     | BIO2     | BIO3     | BIO4     | BIO5     | BIO6     | BIO7     | BIO8     | BIO9     | BIO10    | BIO11    | BIO12    | BIO13    | BIO14    | BIO15    | BIO16    | BIO17    | BIO18    | BIO19    | ALT      |
|-------|----------|----------|----------|----------|----------|----------|----------|----------|----------|----------|----------|----------|----------|----------|----------|----------|----------|----------|----------|----------|
| BIO1  | 1.00000  | 0.03370  | 0.65141  | -0.69035 | 0.79086  | 0.93891  | -0.70876 | 0.60665  | 0.71150  | 0.87390  | 0.95602  | 0.24687  | 0.40067  | 0.03689  | 0.36658  | 0.35446  | 0.04674  | 0.31015  | 0.02941  | -0.36906 |
| BIO2  | 0.03370  | 1.00000  | 0.40684  | -0.14158 | 0.29461  | -0.01004 | 0.17556  | -0.04022 | 0.17225  | -0.01699 | 0.09784  | -0.63989 | -0.42746 | -0.55585 | 0.38066  | -0.45303 | -0.57517 | -0.48835 | -0.46021 | 0.62933  |
| BIO3  | 0.65141  | 0.40684  | 1.00000  | -0.93627 | 0.29998  | 0.78439  | -0.79205 | 0.19534  | 0.68091  | 0.24988  | 0.81945  | 0.05089  | 0.38452  | -0.30020 | 0.61371  | 0.34662  | -0.29505 | 0.05929  | -0.05520 | 0.29948  |
| BIO4  | -0.69035 | -0.14158 | -0.93627 | 1.00000  | -0.22366 | -0.87370 | 0.94347  | -0.13987 | -0.75597 | -0.25561 | -0.86990 | -0.26242 | -0.51638 | 0.08915  | -0.46215 | -0.48523 | 0.07317  | -0.15751 | -0.17455 | -0.16254 |
| BIO5  | 0.79086  | 0.29461  | 0.29998  | -0.22366 | 1.00000  | 0.59059  | -0.16730 | 0.57133  | 0.48816  | 0.92644  | 0.63876  | -0.13294 | -0.03067 | -0.13834 | 0.25473  | -0.07573 | -0.14141 | 0.00151  | -0.24002 | -0.37143 |
| BIO6  | 0.93891  | -0.01004 | 0.78439  | -0.87370 | 0.59059  | 1.00000  | -0.89440 | 0.40757  | 0.81298  | 0.67318  | 0.98992  | 0.32514  | 0.50551  | 0.03680  | 0.37636  | 0.46649  | 0.05332  | 0.26292  | 0.17611  | -0.22818 |
| BIO7  | -0.70876 | 0.17556  | -0.79205 | 0.94347  | -0.16730 | -0.89440 | 1.00000  | -0.18128 | -0.72268 | -0.30898 | -0.85539 | -0.47092 | -0.63459 | -0.12164 | -0.31862 | -0.61190 | -0.14351 | -0.32038 | -0.34819 | 0.07291  |
| BIO8  | 0.60665  | -0.04022 | 0.19534  | -0.13987 | 0.57133  | 0.40757  | -0.18128 | 1.00000  | 0.00907  | 0.69790  | 0.45754  | 0.06166  | 0.18294  | -0.04753 | 0.32089  | 0.14436  | -0.05321 | 0.43497  | -0.31937 | -0.37156 |
| BIO9  | 0.71150  | 0.17225  | 0.68091  | -0.75597 | 0.48816  | 0.81298  | -0.72268 | 0.00907  | 1.00000  | 0.46371  | 0.79830  | 0.19217  | 0.29076  | 0.04989  | 0.20017  | 0.26736  | 0.06703  | -0.01957 | 0.29401  | -0.04413 |
| BIO10 | 0.87390  | -0.01699 | 0.24988  | -0.25561 | 0.92644  | 0.67318  | -0.30898 | 0.69790  | 0.46371  | 1.00000  | 0.69892  | 0.12903  | 0.16548  | 0.09272  | 0.17737  | 0.12489  | 0.09459  | 0.26860  | -0.07952 | -0.58264 |
| BIO11 | 0.95602  | 0.09784  | 0.81945  | -0.86990 | 0.63876  | 0.98992  | -0.85539 | 0.45754  | 0.79830  | 0.69892  | 1.00000  | 0.25611  | 0.46334  | -0.02220 | 0.43367  | 0.41939  | -0.00915 | 0.24913  | 0.08968  | -0.17480 |
| BIO12 | 0.24687  | -0.63989 | 0.05089  | -0.26242 | -0.13294 | 0.32514  | -0.47092 | 0.06166  | 0.19217  | 0.12903  | 0.25611  | 1.00000  | 0.85071  | 0.72049  | -0.24754 | 0.87344  | 0.74870  | 0.72423  | 0.75516  | -0.46323 |
| BIO13 | 0.40067  | -0.42746 | 0.38452  | -0.51638 | -0.03067 | 0.50551  | -0.63459 | 0.18294  | 0.29076  | 0.16548  | 0.46334  | 0.85071  | 1.00000  | 0.29678  | 0.24202  | 0.99124  | 0.32714  | 0.67797  | 0.53181  | -0.27692 |
| BIO14 | 0.03689  | -0.55585 | -0.30020 | 0.08915  | -0.13834 | 0.03680  | -0.12164 | -0.04753 | 0.04989  | 0.09272  | -0.02220 | 0.72049  | 0.29678  | 1.00000  | -0.71997 | 0.32393  | 0.99267  | 0.53931  | 0.62216  | -0.45948 |
| BIO15 | 0.36658  | 0.38066  | 0.61371  | -0.46215 | 0.25473  | 0.37636  | -0.31862 | 0.32089  | 0.20017  | 0.17737  | 0.43367  | -0.24754 | 0.24202  | -0.71997 | 1.00000  | 0.20405  | -0.71706 | -0.05150 | -0.34308 | 0.21100  |
| BIO16 | 0.35446  | -0.45303 | 0.34662  | -0.48523 | -0.07573 | 0.46649  | -0.61190 | 0.14436  | 0.26736  | 0.12489  | 0.41939  | 0.87344  | 0.99124  | 0.32393  | 0.20405  | 1.00000  | 0.35506  | 0.67451  | 0.57226  | -0.28296 |
| BIO17 | 0.04674  | -0.57517 | -0.29505 | 0.07317  | -0.14141 | 0.05332  | -0.14351 | -0.05321 | 0.06703  | 0.09459  | -0.00915 | 0.74870  | 0.32714  | 0.99267  | -0.71706 | 0.35506  | 1.00000  | 0.54648  | 0.66016  | -0.46924 |
| BIO18 | 0.31015  | -0.48835 | 0.05929  | -0.15751 | 0.00151  | 0.26292  | -0.32038 | 0.43497  | -0.01957 | 0.26860  | 0.24913  | 0.72423  | 0.67797  | 0.53931  | -0.05150 | 0.67451  | 0.54648  | 1.00000  | 0.22742  | -0.42103 |
| BIO19 | 0.02941  | -0.46021 | -0.05520 | -0.17455 | -0.24002 | 0.17611  | -0.34819 | -0.31937 | 0.29401  | -0.07952 | 0.08968  | 0.75516  | 0.53181  | 0.62216  | -0.34308 | 0.57226  | 0.66016  | 0.22742  | 1.00000  | -0.31054 |
| ALT   | -0.36906 | 0.62933  | 0.29948  | -0.16254 | -0.37143 | -0.22818 | 0.07291  | -0.37156 | -0.04413 | -0.58264 | -0.17480 | -0.46323 | -0.27692 | -0.45948 | 0.21100  | -0.28296 | -0.46924 | -0.42103 | -0.31054 | 1.00000  |
