# Supplementary material for: Assessment of the Geographic Distribution of Ornithodoros turicata (Argasidae): Climate Variation and Host Diversity
Source: PubMed Central journal article supplement (PMC4734830; doi:10.1371/journal.pntd.0004383), 2016-02-01
Supplement: pntd.0004383.s009.pdf [file pntd.0004383.s009.pdf]

**S4 Table.** Literature search of tick-borne relapsing fever spirochetes as an indicator of *O. turicata* distribution

| Detection method                                         | State | County      | Location                           | Year       | Isolate | Reference |
|----------------------------------------------------------|-------|-------------|------------------------------------|------------|---------|-----------|
| Infected <i>O. turicata</i>                              | TX    | Gaines      | -                                  | 1950       | -       | [1]       |
| Infected <i>O. turicata</i>                              | TX    | Cochran     | -                                  | 1950       | -       | [1]       |
| Infected <i>O. turicata</i>                              | TX    | Dawson      | -                                  | 1950       | -       | [1]       |
| Infected <i>O. turicata</i>                              | TX    | Terry       | -                                  | 1950       | -       | [1]       |
| Infected <i>O. turicata</i>                              | TX    | Martin      | -                                  | 1950       | -       | [1]       |
| Infected <i>O. turicata</i>                              | TX    | Winkler     | -                                  | 1950       | -       | [1]       |
| Infected <i>O. turicata</i>                              | TX    | Ward        | -                                  | 1950       | -       | [1]       |
| Infected <i>O. turicata</i>                              | TX    | Val Verde   | -                                  | 1950       | -       | [1]       |
| Infected <i>O. turicata</i>                              | TX    | Edwards     | -                                  | 1950       | -       | [1]       |
| Infected <i>O. turicata</i>                              | TX    | Maverick    | -                                  | 1950       | -       | [1]       |
| Infected <i>O. turicata</i>                              | TX    | Zavala      | -                                  | 1950       | -       | [1]       |
| Infected <i>O. turicata</i>                              | TX    | Dimmit      | -                                  | 1950       | -       | [1]       |
| Infected <i>O. turicata</i>                              | TX    | Uvalde      | -                                  | 1950       | -       | [1]       |
| Infected <i>O. turicata</i>                              | TX    | Medina      | -                                  | 1950       | -       | [1]       |
| Infected <i>O. turicata</i>                              | TX    | Bexar       | -                                  | 1950       | -       | [1]       |
| Infected <i>O. turicata</i>                              | TX    | Hays        | -                                  | 1950       | -       | [1]       |
| Infected <i>O. turicata</i>                              | TX    | Travis      | -                                  | 1950       | -       | [1]       |
| Infected <i>O. turicata</i>                              | TX    | Williamson  | -                                  | 1950       | -       | [1]       |
| Infected <i>O. turicata</i>                              | TX    | Burnet      | -                                  | 1950       | -       | [1]       |
| Infected <i>O. turicata</i>                              | TX    | Bell        | -                                  | 1950       | -       | [1]       |
| Infected <i>O. turicata</i>                              | TX    | Coryell     | -                                  | 1950       | -       | [1]       |
| Infected <i>O. turicata</i>                              | TX    | Lampasas    | -                                  | 1950       | -       | [1]       |
| Infected <i>O. turicata</i>                              | TX    | San Saba    | -                                  | 1950       | -       | [1]       |
| Infected <i>O. turicata</i>                              | TX    | Brown       | -                                  | 1950       | -       | [1]       |
| Infected <i>O. turicata</i>                              | TX    | Comanche    | -                                  | 1950       | -       | [1]       |
| Infected <i>O. turicata</i>                              | TX    | Lano        | -                                  | 1950       | -       | [1]       |
| Infected <i>O. turicata</i>                              | TX    | Gillespie   | -                                  | 1950       | -       | [1]       |
| Infected <i>O. turicata</i>                              | TX    | Kimble      | -                                  | 1950       | -       | [1]       |
| Infected <i>O. turicata</i>                              | TX    | Menard      | -                                  | 1950       | -       | [1]       |
| Infected <i>O. turicata</i>                              | TX    | Tom Green   | -                                  | 1950       | -       | [1]       |
| Infected <i>O. turicata</i>                              | TX    | Sutton      | -                                  | 1950       | -       | [1]       |
| Infected <i>O. turicata</i>                              | TX    | Shackelford | -                                  | 1950       | -       | [1]       |
| Infected <i>O. turicata</i>                              | TX    | Dallas      | -                                  | 1950       | -       | [1]       |
| Infected <i>O. turicata</i>                              | TX    | Tarrant     | -                                  | 1950       | -       | [1]       |
| Infected <i>O. turicata</i>                              | TX    | Denton      | -                                  | 1950       | -       | [1]       |
| Retrospective diagnosis of <i>B. turicatae</i> infection | TX    | Mills       | “Northwest corner of Mills county” | 1950, 1938 | -       | [1,2]     |

|                                                          |    |          |                             |            |   |       |
|----------------------------------------------------------|----|----------|-----------------------------|------------|---|-------|
| Retrospective diagnosis of <i>B. turicatae</i> infection | TX | Kimble   | “12 miles west of Junction” | 1938       | - | [2]   |
| Retrospective diagnosis of <i>B. turicatae</i> infection | TX | Crockett | -                           | 1995       | + | [3]   |
| Domestic canine                                          | TX | Taylor   | -                           | 1995       | - | [3]   |
| Retrospective diagnosis of <i>B. turicatae</i> infection | TX | Starr    | “Along the Rio Grande”      | 1995       | - | [3]   |
| Infected <i>O. turicata</i>                              | TX | Atascosa | -                           | 2005       | + | [4]   |
| <i>B. turicatae</i> isolated from domestic canine        | TX | Wichita  | Wichita Falls               | 2007       | - | [5]   |
| <i>B. turicatae</i> isolated from domestic canine        | TX | Clay     | Henrietta                   | 2005, 2007 | + | [4,5] |
| <i>B. turicatae</i> isolated from domestic canine        | TX | Lubbock  | Slaton                      | 2005, 2007 | + | [4,5] |
| Infected <i>O. turicata</i>                              | TX | Real     | -                           | 2005       | + | [4]   |
| Infected <i>O. turicata</i>                              | KS | Clark    | Ashland                     | 1943       | - | [7]   |
| <i>B. turicatae</i> isolated from domestic canine        | FL | Sumner   | “cypress swamp”             | 2005, 1994 | + | [4,8] |

## References

1. Eads RB, Henderson HE, McGregor T, Irons JV (1950) Relapsing fever in Texas; distribution of laboratory confirmed cases and the arthropod reservoirs. *Am J Trop Med Hyg* 30: 73-76.
2. Francis E (1938) Longevity of the tick *Ornithodoros turicata* and of *Spirochaeta recurrentis* with this tick. *Publ Hlth Rep* 53: 2220-2241.
3. Rawlings JA (1995) An overview of tick-borne relapsing fever with emphasis on outbreaks in Texas. *Tex Med* 91: 56-59.
4. Schwan TG, Raffel SJ, Schrupf ME, Policastro PF, Rawlings JA, et al. (2005) Phylogenetic analysis of the spirochetes *Borrelia parkeri* and *Borrelia turicatae* and the potential for tick-borne relapsing fever in Florida. *J Clin Microbiol* 43: 3851-3859.
5. Whitney MS, Schwan TG, Sultemeier KB, McDonald PS, Brillhart MN (2007) Spirochetemia caused by *Borrelia turicatae* infection in 3 dogs in Texas. *Vet Clin Pathol* 36: 212-216.
6. Davis H, Vincent JM, Lynch J (2002) Tick-borne relapsing fever caused by *Borrelia turicatae*. *Pediatr Infect Dis J* 21: 703-705.
7. Davis GE (1943) Relapsing fever: the tick *Ornithodoros turicata* as a spirochetal reservoir. *Pub Health Rep* 58: 839-842.
8. Breitschwerdt EB, Nicholson WL, Kiehl AR, Steers C, Meuten DJ, et al. (1994) Natural infections with *Borrelia* spirochetes in two dogs from Florida. *J Clin Microbiol* 32: 352-357.
